# Supplementary material for: Reducing Behavioral Health Inpatient Readmissions for People With Substance Use Disorders: Do Follow-Up Services Matter?
Source: Atypon-hosted journal article supplement (doi:10.1176/appi.ps.201600339), 2017-04-17
Supplement: appi.ps.201600339.ds001.pdf [file appi.ps.201600339.ds001.pdf]

**Appendix - Table 1. Medicaid Sample and Characteristics of Patients and Their Index Admissions by State**

|                                        | Connecticut |       | Illinois |       | Indiana |       | Minnesota |       | Missouri |       | North Carolina |       | New York |       | Vermont |       | West Virginia |       | Wisconsin |       |
|----------------------------------------|-------------|-------|----------|-------|---------|-------|-----------|-------|----------|-------|----------------|-------|----------|-------|---------|-------|---------------|-------|-----------|-------|
|                                        | N           | %     | N        | %     | N       | %     | N         | %     | N        | %     | N              | %     | N        | %     | N       | %     | N             | %     | N         | %     |
| <b>Medicaid Sample<sup>a</sup> (%)</b> |             |       |          |       |         |       |           |       |          |       |                |       |          |       |         |       |               |       |           |       |
| Excluded –managed care                 |             | 30.1  |          | 72.6  |         | 80.0  |           | 71.6  |          | 48.7  |                | 75.3  |          | 70.6  |         | 72.5  |               | 59.8  |           | 70.2  |
| Excluded – dual eligible               |             | 18.7  |          | 12.4  |         | 14.4  |           | 18.3  |          | 16.7  |                | 17.8  |          | 14.8  |         | 19.0  |               | 19.8  |           | 19.4  |
| Included                               |             | 51.2  |          | 15.0  |         | 5.6   |           | 10.1  |          | 34.6  |                | 6.9   |          | 14.6  |         | 8.5   |               | 20.4  |           | 10.4  |
| <b>Characteristic</b>                  |             |       |          |       |         |       |           |       |          |       |                |       |          |       |         |       |               |       |           |       |
| Total patients                         | 1,599       | 100.0 | 7,605    | 100.0 | 1,212   | 100.0 | 1,050     | 100.0 | 2,236    | 100.0 | 3,636          | 100.0 | 10,889   | 100.0 | 690     | 100.0 | 795           | 100.0 | 727       | 100.0 |
| Sex                                    |             |       |          |       |         |       |           |       |          |       |                |       |          |       |         |       |               |       |           |       |
| Male                                   | 789         | 49.3  | 3822     | 50.3  | 752     | 62.0  | 520       | 49.5  | 1280     | 57.2  | 1661           | 45.7  | 7253     | 66.6  | 267     | 38.7  | 480           | 60.4  | 290       | 39.9  |
| Female                                 | 810         | 50.7  | 3783     | 49.7  | 460     | 38.0  | 530       | 50.5  | 956      | 42.8  | 1975           | 54.3  | 3636     | 33.4  | 423     | 61.3  | 315           | 39.6  | 437       | 60.1  |
| Race/ethnicity                         |             |       |          |       |         |       |           |       |          |       |                |       |          |       |         |       |               |       |           |       |
| White                                  | 840         | 52.5  | 2419     | 31.8  | 884     | 72.9  | 570       | 54.3  | 1598     | 71.5  | 1924           | 52.9  | 3210     | 29.5  | 638     | 92.5  | 750           | 94.3  | 288       | 39.6  |
| Black                                  | 392         | 24.5  | 4348     | 57.2  | 291     | 24.0  | 275       | 26.2  | 579      | 25.9  | 1456           | 40.0  | 4506     | 41.4  | 8       | 1.2   | 45            | 5.7   | 39        | 5.4   |
| Hispanic                               | 353         | 22.1  | 512      | 6.7   | 28      | 2.3   | 26        | 2.5   | 2        | 0.1   | 40             | 1.1   | 2757     | 25.3  | 4       | 0.6   | 0             | -     | 11        | 1.5   |
| Other                                  | 14          | 0.9   | 33       | 0.4   | 3       | 0.2   | 169       | 16.1  | 6        | 0.3   | 132            | 3.6   | 199      | 1.8   | 1       | 0.1   | 0             | -     | 33        | 4.5   |
| Unknown                                | 0           | -     | 293      | 3.9   | 6       | 0.5   | 10        | 1.0   | 51       | 2.3   | 84             | 2.3   | 217      | 2.0   | 39      | 5.7   | 0             | -     | 356       | 49.0  |
| Age                                    |             |       |          |       |         |       |           |       |          |       |                |       |          |       |         |       |               |       |           |       |
| 18-39                                  | 569         | 35.6  | 2525     | 33.2  | 304     | 25.1  | 358       | 34.1  | 864      | 38.6  | 1459           | 40.1  | 3094     | 28.4  | 426     | 61.7  | 266           | 33.5  | 309       | 42.5  |
| 40-59                                  | 940         | 58.8  | 4622     | 60.8  | 814     | 67.2  | 606       | 57.7  | 1291     | 57.7  | 1948           | 53.6  | 7207     | 66.2  | 240     | 34.8  | 477           | 60.0  | 382       | 52.5  |
| 60-64                                  | 90          | 5.6   | 458      | 6.0   | 94      | 7.8   | 86        | 8.2   | 81       | 3.6   | 229            | 6.3   | 588      | 5.4   | 24      | 3.5   | 52            | 6.5   | 36        | 5.0   |
| Comorbidities                          |             |       |          |       |         |       |           |       |          |       |                |       |          |       |         |       |               |       |           |       |
| Mental disorder                        | 784         | 49.0  | 4040     | 53.1  | 639     | 52.7  | 686       | 65.3  | 1284     | 57.4  | 2037           | 56.0  | 4787     | 44.0  | 269     | 39.0  | 470           | 59.1  | 442       | 60.8  |
| Physical                               | 914         | 57.2  | 5235     | 68.8  | 962     | 79.4  | 784       | 74.7  | 1160     | 51.9  | 2671           | 73.5  | 7398     | 67.9  | 236     | 34.2  | 615           | 77.4  | 544       | 74.8  |
| Basis of Medicaid eligibility          |             |       |          |       |         |       |           |       |          |       |                |       |          |       |         |       |               |       |           |       |
| Disability                             | 1171        | 73.2  | 5595     | 73.6  | 1182    | 97.5  | 961       | 91.5  | 2060     | 92.1  | 2519           | 69.3  | 5368     | 49.3  | 169     | 24.5  | 755           | 95.0  | 496       | 68.2  |
| Other                                  | 428         | 26.8  | 2,010    | 26.4  | 30      | 2.5   | 89        | 8.5   | 176      | 7.9   | 1,117          | 30.7  | 5,521    | 50.7  | 521     | 75.5  | 40            | 5.0   | 231       | 31.8  |

|                                               |     |      |      |      |     |      |     |      |     |      |     |      |      |      |     |      |     |      |     |      |
|-----------------------------------------------|-----|------|------|------|-----|------|-----|------|-----|------|-----|------|------|------|-----|------|-----|------|-----|------|
| Substance use diagnosis at index              |     |      |      |      |     |      |     |      |     |      |     |      |      |      |     |      |     |      |     |      |
| Alcohol only                                  | 356 | 22.3 | 1467 | 19.3 | 318 | 26.2 | 261 | 24.9 | 768 | 34.3 | 743 | 20.4 | 1862 | 17.1 | 236 | 34.2 | 234 | 29.4 | 182 | 25.0 |
| Any opiate                                    | 565 | 35.3 | 2274 | 29.9 | 150 | 12.4 | 117 | 11.1 | 280 | 12.5 | 461 | 12.7 | 3894 | 35.8 | 239 | 34.6 | 160 | 20.1 | 160 | 22.0 |
| Prior behavioral health services <sup>b</sup> |     |      |      |      |     |      |     |      |     |      |     |      |      |      |     |      |     |      |     |      |
| Medication-assisted treatment                 | 273 | 17.1 | 253  | 3.3  | 23  | 1.9  | 65  | 6.2  | 76  | 3.4  | 135 | 3.7  | 435  | 4.0  | 158 | 22.9 | 32  | 4.0  | 97  | 13.3 |
| Inpatient                                     | 141 | 8.8  | 1291 | 17.0 | 83  | 6.8  | 70  | 6.7  | 319 | 14.3 | 168 | 4.6  | 1790 | 16.4 | 39  | 5.7  | 49  | 6.2  | 50  | 6.9  |
| Outpatient                                    | 411 | 25.7 | 2006 | 26.4 | 334 | 27.6 | 304 | 29.0 | 438 | 19.6 | 673 | 18.5 | 3142 | 28.9 | 242 | 35.1 | 189 | 23.8 | 143 | 19.7 |

<sup>a</sup> Percent of state Medicaid population covered by managed care plans or dually eligible for Medicare and Medicaid. (Source: Centers for Medicare & Medicaid Services (n.d.). "Medicaid Analytic eXtract (MAX) General Information." <https://www.cms.gov/research-statistics-data-and-systems/computer-data-and-systems/medicaiddatasourcesgeninfo/maxgeneralinformation.html>)

<sup>b</sup> Services that were received within 90 days before the index admission.

Source: 2008 Medicaid Analytic eXtract (MAX)

**Appendix - Table 2. Characteristics of Behavioral Health Follow-Up Services Within 14 Days of Discharge and Inpatient Admissions Within 90 Days of Discharge, by State**

| Characteristic                                                            | Connecticut |       | Illinois |       | Indiana |       | Minnesota |       | Missouri |       | North Carolina |       | New York |       | Vermont |       | West Virginia |       | Wisconsin |       |
|---------------------------------------------------------------------------|-------------|-------|----------|-------|---------|-------|-----------|-------|----------|-------|----------------|-------|----------|-------|---------|-------|---------------|-------|-----------|-------|
|                                                                           | N           | %     | N        | %     | N       | %     | N         | %     | N        | %     | N              | %     | N        | %     | N       | %     | N             | %     | N         | %     |
| Total patients                                                            | 1,599       | 100.0 | 7,605    | 100.0 | 1,212   | 100.0 | 1,050     | 100.0 | 2,236    | 100.0 | 3,636          | 100.0 | 10,889   | 100.0 | 690     | 100.0 | 795           | 100.0 | 727       | 100.0 |
| Follow-up services<br>14 days<br>postdischarge                            |             |       |          |       |         |       |           |       |          |       |                |       |          |       |         |       |               |       |           |       |
| RES                                                                       | 33          | 2.1   | --       | --    | --      | --    | 42        | 4.0   | --       | --    | --             | --    | --       | --    | 201     | 29.1  | --            | --    | --        | --    |
| IOP                                                                       | 125         | 7.8   | --       | --    | 63      | 5.2   | 38        | 3.6   | 132      | 5.9   | --             | --    | --       | --    | 14      | 2.0   | --            | --    | --        | --    |
| OP (excludes IOP)<br>No RES, IOP or OP<br>service                         | 246         | 15.4  | 2101     | 27.6  | 258     | 21.3  | 182       | 17.3  | 439      | 19.6  | 602            | 16.6  | 2668     | 24.5  | 131     | 19.0  | 146           | 18.4  | 156       | 21.5  |
| Follow-up MAT 14<br>days postdischarge                                    | 1,195       | 74.7  | 5,504    | 72.4  | 891     | 73.5  | 788       | 75.0  | 1,665    | 74.5  | 3,034          | 83.4  | 8,221    | 75.5  | 344     | 49.9  | 649           | 81.6  | 571       | 78.5  |
| Time to first follow-<br>up service (RES, IOP,<br>OP or MAT) <sup>a</sup> | 233         | 14.6  | 243      | 3.2   | 133     | 11.0  | 66        | 6.3   | 85       | 3.8   | 153            | 4.2   | 1901     | 17.5  | 181     | 26.2  | 50            | 6.3   | 110       | 15.1  |
| 0 day                                                                     | 81          | 5.1   | 583      | 7.7   | 95      | 7.8   | 101       | 9.6   | 193      | 8.6   | 115            | 3.2   | 584      | 5.4   | 76      | 11.0  | 25            | 3.1   | 91        | 12.5  |
| 1 day                                                                     | 75          | 4.7   | 449      | 5.9   | 46      | 3.8   | 31        | 3.0   | 68       | 3.0   | 110            | 3.0   | 549      | 5.0   | 156     | 22.6  | 29            | 3.6   | 41        | 5.6   |
| 2 day                                                                     | 60          | 3.8   | 207      | 2.7   | 34      | 2.8   | 19        | 1.8   | 37       | 1.7   | 53             | 1.5   | 503      | 4.6   | 38      | 5.5   | 14            | 1.8   | 16        | 2.2   |
| 3 day                                                                     | 61          | 3.8   | 128      | 1.7   | 19      | 1.6   | 22        | 2.1   | 37       | 1.7   | 58             | 1.6   | 430      | 3.9   | 25      | 3.6   | 15            | 1.9   | 7         | 1.0   |
| 4 day                                                                     | 59          | 3.7   | 155      | 2.0   | 24      | 2.0   | 16        | 1.5   | 23       | 1.0   | 45             | 1.2   | 444      | 4.1   | 36      | 5.2   | 18            | 2.3   | 9         | 1.2   |
| 5 day                                                                     | 53          | 3.3   | 110      | 1.4   | 14      | 1.2   | 16        | 1.5   | 31       | 1.4   | 48             | 1.3   | 380      | 3.5   | 12      | 1.7   | 12            | 1.5   | 6         | 0.8   |
| 6 day                                                                     | 54          | 3.4   | 107      | 1.4   | 27      | 2.2   | 18        | 1.7   | 21       | 0.9   | 55             | 1.5   | 414      | 3.8   | 16      | 2.3   | 6             | 0.8   | 11        | 1.5   |
| 7 day                                                                     | 24          | 1.5   | 83       | 1.1   | 23      | 1.9   | 8         | 0.8   | 35       | 1.6   | 50             | 1.4   | 143      | 1.3   | 15      | 2.2   | 10            | 1.3   | 9         | 1.2   |
| 8 day                                                                     | 25          | 1.6   | 87       | 1.1   | 13      | 1.1   | 12        | 1.1   | 32       | 1.4   | 37             | 1.0   | 127      | 1.2   | 9       | 1.3   | 5             | 0.6   | 6         | 0.8   |
| 9 day                                                                     | 21          | 1.3   | 70       | 0.9   | 4       | 0.3   | 10        | 1.0   | 25       | 1.1   | 33             | 0.9   | 115      | 1.1   | 12      | 1.7   | 6             | 0.8   | 7         | 1.0   |
| 10 day                                                                    | 20          | 1.3   | 70       | 0.9   | 10      | 0.8   | 12        | 1.1   | 26       | 1.2   | 21             | 0.6   | 118      | 1.1   | 7       | 1.0   | 8             | 1.0   | 4         | 0.6   |

|                                                  |       |      |       |      |       |      |     |      |       |      |       |      |       |      |     |      |     |      |     |      |
|--------------------------------------------------|-------|------|-------|------|-------|------|-----|------|-------|------|-------|------|-------|------|-----|------|-----|------|-----|------|
| 11 day                                           | 20    | 1.3  | 55    | 0.7  | 9     | 0.7  | 10  | 1.0  | 12    | 0.5  | 36    | 1.0  | 90    | 0.8  | 8   | 1.2  | 14  | 1.8  | 4   | 0.6  |
| 12 day                                           | 12    | 0.8  | 48    | 0.6  | 13    | 1.1  | 7   | 0.7  | 23    | 1.0  | 30    | 0.8  | 82    | 0.8  | 3   | 0.4  | 8   | 1.0  | 5   | 0.7  |
| 13 day                                           | 14    | 0.9  | 63    | 0.8  | 8     | 0.7  | 8   | 0.8  | 23    | 1.0  | 22    | 0.6  | 88    | 0.8  | 4   | 0.6  | 10  | 1.3  | 8   | 1.1  |
| 14 day                                           | 12    | 0.8  | 47    | 0.6  | 8     | 0.7  | 15  | 1.4  | 24    | 1.1  | 30    | 0.8  | 73    | 0.7  | 6   | 0.9  | 5   | 0.6  | 10  | 1.4  |
| No RES, IOP, OP<br>or MAT service                | 1008  | 63.0 | 5343  | 70.3 | 865   | 71.4 | 745 | 71.0 | 1626  | 72.7 | 2893  | 79.6 | 6749  | 62.0 | 267 | 38.7 | 610 | 76.7 | 493 | 67.8 |
| Inpatient admission<br>90 days<br>postdischarge  |       |      |       |      |       |      |     |      |       |      |       |      |       |      |     |      |     |      |     |      |
| Any                                              | 748   | 46.8 | 4164  | 54.8 | 485   | 40.0 | 395 | 37.6 | 915   | 40.9 | 1265  | 34.8 | 5910  | 54.3 | 292 | 42.3 | 289 | 36.4 | 239 | 32.9 |
| Behavioral health                                | 525   | 32.8 | 2518  | 33.1 | 180   | 14.9 | 176 | 16.8 | 548   | 24.5 | 491   | 13.5 | 3997  | 36.7 | 238 | 34.5 | 135 | 17.0 | 110 | 15.1 |
| Time to behavioral health<br>inpatient admission |       |      |       |      |       |      |     |      |       |      |       |      |       |      |     |      |     |      |     |      |
| < 7 days                                         | 308   | 19.3 | 948   | 12.5 | 42    | 3.5  | 44  | 4.2  | 138   | 6.2  | 208   | 5.7  | 1828  | 16.8 | 188 | 27.2 | 41  | 5.2  | 19  | 2.6  |
| 7-14 days                                        | 45    | 2.8  | 358   | 4.7  | 17    | 1.4  | 27  | 2.6  | 78    | 3.5  | 50    | 1.4  | 480   | 4.4  | 8   | 1.2  | 17  | 2.1  | 23  | 3.2  |
| 15-30 days                                       | 50    | 3.1  | 477   | 6.3  | 37    | 3.1  | 25  | 2.4  | 114   | 5.1  | 79    | 2.2  | 580   | 5.3  | 16  | 2.3  | 23  | 2.9  | 28  | 3.9  |
| 31-60 days                                       | 80    | 5.0  | 472   | 6.2  | 50    | 4.1  | 35  | 3.3  | 132   | 5.9  | 81    | 2.2  | 671   | 6.2  | 14  | 2.0  | 28  | 3.5  | 26  | 3.6  |
| 61-90 days                                       | 42    | 2.6  | 263   | 3.5  | 34    | 2.8  | 45  | 4.3  | 86    | 3.8  | 73    | 2.0  | 438   | 4.0  | 12  | 1.7  | 26  | 3.3  | 14  | 1.9  |
| No inpatient<br>admission                        | 1,074 | 67.2 | 5,087 | 66.9 | 1,032 | 85.1 | 874 | 83.2 | 1,688 | 75.5 | 3,145 | 86.5 | 6,892 | 63.3 | 452 | 65.5 | 660 | 83.0 | 617 | 84.9 |

Abbreviations: IOP, intensive outpatient; MAT, medication-assisted treatment; OP, outpatient; RES, residential

Two dashes (--) indicate that the services was not included in the available data for that state.

<sup>a</sup> For the few individuals who received more than one of the IOP, OP, or RES follow-up services (excluding MAT), an episode approach was used where only the most intensive service was coded.

Source: 2008 Medicaid Analytic eXtract (MAX)
